# Supplementary material
Source: PubMed Central journal article supplement (PMC6502482)

## **Supporting Information**

### **Targeting and Internalization of Liposomes by Bladder Tumor Cells Using a Fibronectin**

#### **Attachment Protein-derived Peptide-Lipopolymer Conjugate**

Young Lee, Erin Kischuk, Scott Crist, Timothy L. Ratliff, David H. Thompson\*  
Purdue University Center for Cancer Research  
Multi-disciplinary Cancer Research Facility  
Purdue University  
1201 W. State Street  
West Lafayette, IN 47907

\* Corresponding author  
E-mail address: [davethom@purdue.edu](mailto:davethom@purdue.edu)

#### **Table of Contents**

|                                                                      |   |
|----------------------------------------------------------------------|---|
| Size Analysis of Liposome Formulation                                | 2 |
| Cytotoxicity of FAP Peptide-targeted Liposomes by Live/Dead Analysis | 3 |

## Size Analysis of Liposome Formulation

**Figure SI 1a:** Dynamic Light Scattering Analysis of Double PEGylated Liposomes Containing 2 mol% RWFV Lipopeptide (58.5:35:4:2:0.5 mol% DPPC:Chol:mPEG1000-DSPE:RWFV-PEG2000-DSPE:Cy5.5-DSPE).

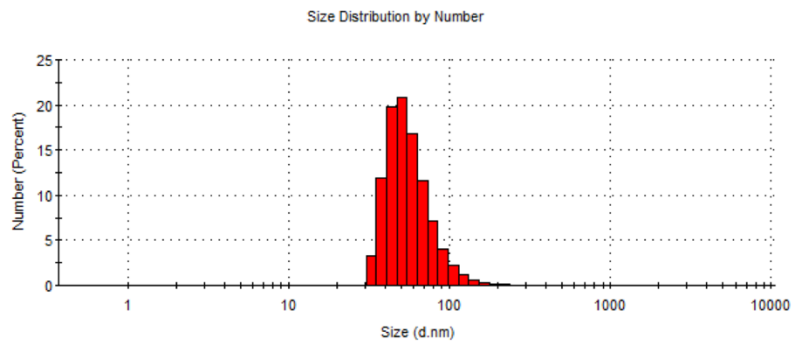

**Figure SI 1b:** Negative Stain TEM Image of Liposomes Containing 2 mol% RWFV Lipopeptide (58.5:35:4:2:0.5 mol% DPPC:Chol:mPEG1000-DSPE:RWFV-PEG2000-DSPE:Cy5.5-DSPE).

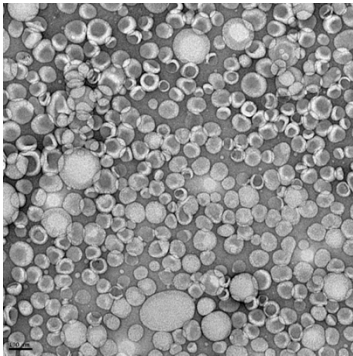

### Cytotoxicity of FAP Peptide-targeted Liposomes by Live/Dead Analysis

**Figure SI 2.** Cell viability of MB49 cells exposed to the liposomes incorporating different functionalized lipopeptides (non-targeted, 2 mol% mPEG2000-DSPE; scrambled, 2 mol% WVRF-PEG2000-DSPE; and targeted, 2 mol% RWFV-PEG2000-DSPE). The liposomes were incubated with MB49 cells for 1 h at 37 °C, followed by aspiration of the media, washing of the cells with PBS, trypsinization, and incubation with 0.5 $\mu$ L LIVE/DEAD<sup>®</sup> cell stains for 20 min in the dark. The fluorescence intensities of the live and dead cells was analyzed by flow cytometry using the FL1 channel. Liposome diameter: 52 nm. 62.5:35:2:0.5 DPPC:Chol:X:Cy5.5-DSPE, where X = RWFV-PEG2000-DSPE (targeted), WVRF-PEG2000-DSPE (scrambled), or mPEG2000-DSPE (non-targeted). Control: no liposome treatment. Error bars indicate the standard deviation of the mean with  $n=3$ .

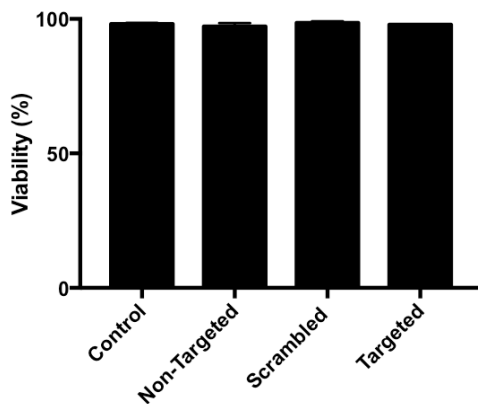

Supplement: NIHMS1011186-supplement-SI_Material.pdf [file NIHMS1011186-supplement-SI_Material.pdf]
